# Supplementary material
Source: publisher site journal article supplement (https://www.dovepress.com/article/453057)
Supplement: Supplementary file 1 [file get_supplementary_file.php]

Supplemental Table 1. Clinical data of 272 older adult patients infected with Omicron sub-variants of COVID-19 in the training cohort and validation cohort.

|  | **Training cohort**  **(n=191)** | **Validation cohort**  **(n=81)** | ***P*** |
| --- | --- | --- | --- |
| Age > 80 yrs | 27 (33.3%) | 83 (43.5%) | 0.155 |
| History of malignancies | 15 (18.5%) | 36 (18.8%) | 1.000 |
| WBC > 9.15×109/L | 7 (8.64%) | 35 (18.3%) | 0.066 |
| NEU > 7×109/L | 8 (9.88%) | 43 (22.5%) | **0.023** |
| LYM < 0.8×109/L | 41 (50.6%) | 99 (51.8%) | 0.960 |
| CRP > 10 mg/L | 38 (46.9%) | 83 (43.5%) | 0.696 |
| PCT > 0.052 ng/mL | 34 (42.0%) | 92 (48.2%) | 0.422 |
| IL-6 > 6.6 pg/mL | 42 (51.9%) | 117 (61.3%) | 0.192 |
| AST > 40 U/L | 15 (18.5%) | 46 (24.1%) | 0.397 |
| LDH > 245 U/L | 34 (42.0%) | 90 (47.1%) | 0.518 |
| Scr > 104 μmol/L | 12 (14.8%) | 38 (19.9%) | 0.413 |
| CD4+ T-LYM < 400/μL | 52 (64.2%) | 119 (62.3%) | 0.874 |
| CD8+ T-LYM < 200/μL | 44 (54.3%) | 90 (47.1%) | 0.340 |
| B-LYM < 50/μL | 15 (18.5%) | 48 (25.1%) | 0.305 |
| PNI > 40 | 44 (54.3%) | 121 (63.4%) | 0.208 |
| MNA-SF score ≤ 7 points | 40 (49.4%) | 99 (51.8%) | 0.813 |
| ADL score ≤ 40 points | 28 (34.6%) | 92 (48.2%) | 0.053 |
| FRAIL score ≥ 3 points | 56 (69.1%) | 125 (65.4%) | 0.653 |

COVID-19, coronavirus disease 2019; WBC, white blood cell count; NEU, neutrophils; LYM, lymphocytes; CRP, C-reactive protein; PCT, procalcitonin; IL-6, interleukin-6; LDH, lactate dehydrogenase; Scr, serum creatinine; CD4+ T-LYM, CD4+ T-lymphocyte count; CD8+ T-LYM, CD8+ T-lymphocyte count; B-LYM, B-lymphocyte count; PNI, Prognosis Nutrition Index; MNA-SF, the Mini Nutritional Assessment Scale-Short Form; ADL, the Activities of Daily Living.

The bold texts were considered the differences of statistically significant (*P*＜0.05).


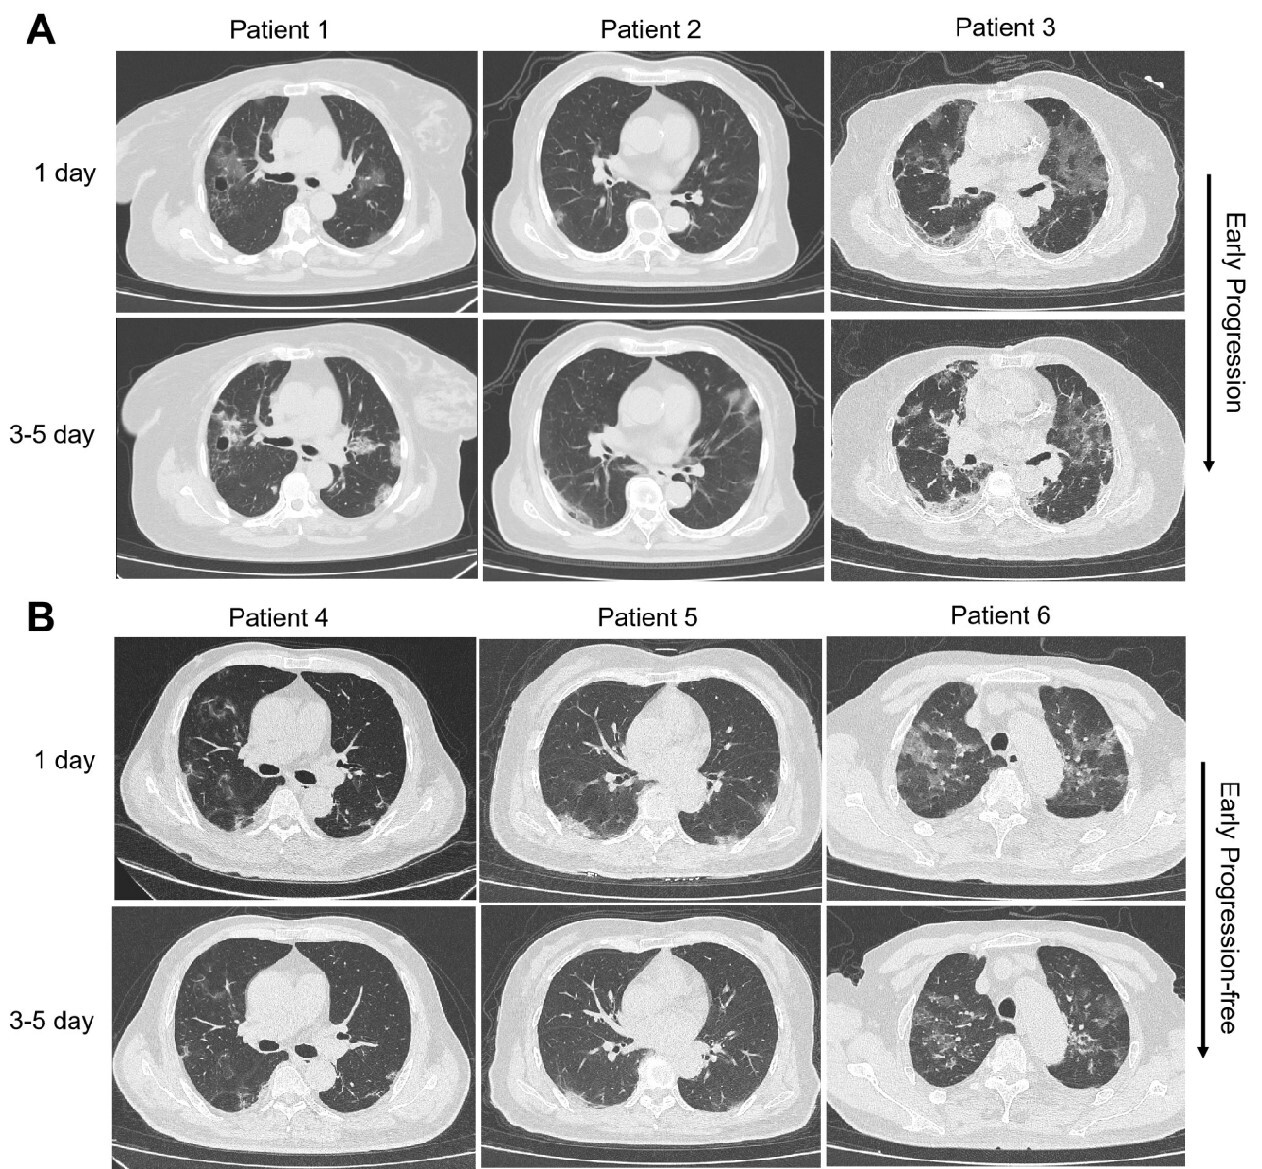


Supplemental Figure 1. Representative chest computed tomography (CT) scans on admission (day 1) and 3-5 days after treatment of older adult patients infected with Omicron sub-variants of COVID-19 who had the early-stage imaging progression (A, Patients 1-3), or progression-free on chest CT (B, Patients 4-6).
